# Supplementary material for: Estimation of rate coefficients and branching ratios for gas-phase reactions of OH with aliphatic organic compounds for use in automated mechanism construction
Source: Copernicus journal article supplement (doi:10.5194/acp-2018-145), 2018-02-19
Supplement: Supplementary file 1 [file acp-2018-145-supplement.zip]

Archive with 6 entries (6 files):
- SI_1_OH_alkane_preferred data.xls
- SI_2_OH_saturated oxygenate_preferred data.xls
- SI_3_OH_alkene_preferred data.xls
- SI_4_OH_unsaturated oxygenate_preferred data.xls
- SI_5_OH_alkyne and alkynol_preferred data.xls
- Supplement aliphatic.pdf
