# Supplementary material for: Estimation of rate coefficients and branching ratios for gas-phase reactions of OH with aliphatic organic compounds for use in automated mechanism construction
Source: Copernicus journal article supplement (doi:10.5194/acp-2018-145), 2018-02-19
Supplement: Supplementary file 1 [file acp-2018-145-supplement.zip › SI_2_OH_saturated oxygenate_preferred data.xls]

## Sheet: Notes
Pressure independent rate coefficients for OH + organic compounds
Rate coefficients in the form: k = A.exp(-E/RT) (i), except for esters
Rate coefficients in the form: k = A.Tn.exp(-E/RT) (ii), with n = 2, for esters
Notes on data table columns
Systematic name	systematic name of organic compound, usually based on IUPAC nomenclature
Alternative name	alternative/common names for organic compound
Carbon number	the number of carbon atoms in the organic compound
SMILES:	SMILES notation for organic compound				http://www.daylight.com/smiles/index.html
InChI:	InChI notation for organic compound				http://iupac.org/who-we-are/divisions/division-details/inchi/
k(298K):	rate coefficient at 298 K in cm3 molecule-1 s-1
A:	cm3 molecule-1 s-1
E/R:	K
Lower T	Lower bound of valid temperature range (K)
Upper T	Upper bound of valid temperature range (K)
Category:	E = evaluation; P = published; G = grey literature
Source	Source reference
Comment:	Any further information influencing the preferred value
Calculated k(298K):	rate coefficient calculated by SAR at 298 K in cm3 molecule-1 s-1

## Sheet: References
References
Atkinson and Arey (2003)	Atkinson, R. and Arey, J.: Atmospheric degradation of volatile organic compounds, Chem. Rev., 103, 4605-4638, 2003.
Baasandorj et al. (2010)	Baasandorj, M., Papanastasiou, D. K., Talukdar, R. K., Hasson A. S. and Burkholder, J. B.: (CH3)3COOH (tert-butyl hydroperoxide): OH reaction rate coefficients between 206 and 375 K and the OH photolysis quantum yield at 248 nm, Phys Chem Chem Phys. 12(38), 12101-12111, 2010.
Bates et al. (2014)	Bates, K. H., Crounse, J. D., St. Clair, J. M., Bennett, N. B., Nguyen, T. B., Seinfeld, J. H. Stoltz, B. M. and Wennberg, P. O.: Gas phase production and loss of isoprene epoxydiols, J. Phys. Chem. A, 118, 1237-1246, 2014.
Bates et al. (2016)	Bates, K. H., Nguyen, T. B., Teng, A. P., Crounse, J. D., Kjaergaard, H. G., Stoltz, B. M., Seinfeld, J. H. and Wennberg, P. O.: Production and fate of C4 dihydroxycarbonyl compounds from isoprene oxidation, J. Phys. Chem. A, 120, 106-117, 2016.
Bouzidi et al. (2017)	Bouzidi, H., Djehiche, M., Coddeville, P., Fittschen, C. and Tomas, A.: Atmospheric chemistry of a-diketones: Kinetics of C5 and C6 compounds with Cl atoms and OH radicals, Int. J. Chem. Kinet., 49, 112-118, 2017.
Calvert et al. (2011)	Calvert, J. G., Mellouki, A., Orlando, J. J., Pilling, M. J. and Wallington, T. J.: The mechanisms of atmospheric oxidation of the oxygenates, Oxford University Press, Oxford. ISBN 978-0-19976707-6, 2011.
IUPAC (Date)	Preferred value of the IUPAC Task Group on Atmospheric Chemical Kinetic Data Evaluation, http://iupac.pole-ether.fr/, in September 2017 ("Date" indicates date of evaluation of specific reaction)
Liu et al. (1990)	Liu, R., Huie, R. E. and Kurylo, M. J.: The gas phase reactions of hydroxyl radicals with a series of nitroalkanes over the temperature range 240-400K, Chem. Phys. Lett., 167, 519-523, 1990.
Mason et al. (2010)	Mason, S. A., Arey J. and Atkinson, R.: Kinetics and products of the OH radical-initiated reaction of 1,4-butanediol and rate constants for the reactions of OH radicals with 4-hydroxybutanal and 3-hydroxypropanal, Environ. Sci. Technol., 44, 707–713, 2010.
Nielsen et al. (1989)	Nielsen, O. J., Sidebottom, H. W., O'Farrell, D. J., Donlon, M. and Treacy, J.: Rate constants for the gas-phase reactions of OH radicals and Cl atoms with CH3CH2NO2, CH3CH2CH2NO2, CH3CH2CH2CH2NO2, and CH3CH2CH2CH2CH2NO2, Chem. Phys. Lett., 156, 312-318, 1989.
Suarez-Bertoa et al. (2012)	Suarez-Bertoa, R., Picquet-Varrault, B., Tamas, W., Pangui, E., and Doussin, J.-F.: Atmospheric fate of a series of carbonyl nitrates: photolysis frequencies and OH-oxidation rate constants, Environ. Sci. Technol., 46, 12502–12509, 2012.
Treves and Rudich (2003)	Treves, K. and Rudich, Y.: The atmospheric fate of C3-C6 hydroxyalkyl nitrates, J. Phys. Chem. A, 107, 7809-7817, 2003.
Walavalkar et al. (2017)	Walavalkar, M. P., Sharma, A., Dhanya, S. and Naik, P. D.: Reactions of lactones with tropospheric oxidants: A kinetics and products study, Atmos. Environ., 161, 18-26, 2017.

## Sheet: alcohols
Systematic name	Aternative name	Carbon number	SMILES	InChI	Reagent	k(298K)	A	E/R	Lower T	Upper T	Category	Source	Comment	Calculated k(298 K)
acyclic alcohols
methanol		1	CO	1S/CH4O/c1-2/h2H,1H3	OH	9e-13	2.85e-12	345	210	300	E	IUPAC (August 2007)		6.08e-13
ethanol		2	CCO	1S/C2H6O/c1-2-3/h3H,2H2,1H3	OH	3.2e-12	3e-12	-20	210	300	E	IUPAC (June 2009)		3.2594e-12
1-propanol	n-propanol	3	CCCO	1S/C3H8O/c1-2-3-4/h4H,2-3H2,1H3	OH	5.8e-12	4.6e-12	-70	260	380	E	IUPAC (August 2007)		6.12914e-12
2-propanol	i-propanol	3	CC(O)C	1S/C3H8O/c1-3(24/h3-4H,1-2H3	OH	5.1e-12	2.6e-12	-200	250	360	E	IUPAC (August 2007)		6.206e-12
1-butanol	n-butanol	4	CCCCO	1S/C4H10O/c1-2-3-4-5/h5H,2-4H2,1H3	OH	8.5e-12	5.3e-12	-140	260	380	E	IUPAC (August 2007)		7.894e-12
2-butanol	sec-butanol	4	CC(O)CC	1S/C4H10O/c1-3-4(25/h4-5H,3H2,1-2H3	OH	8.7e-12					E	IUPAC (August 2007)		9.9842e-12
2-methyl-1-propanol	i-butanol	4	CC(C)CO	1S/C4H10O/c1-4(23-5/h4-5H,3H2,1-2H3	OH	8.9e-12	2.73e-12	-352	240	370	E	IUPAC (June 2009)		8.25134e-12
2-methyl-2-propanol	t-butanol	4	CC(O)(C)C	1S/C4H10O/c1-4(2,35/h5H,1-3H3	OH	1.1e-12	1.6e-12	121	240	314	E	IUPAC (June 2009)		1.193e-12
1-pentanol		5	CCCCCO	1S/C5H12O/c1-2-3-4-5-6/h6H,2-5H2,1H3	OH	1.1e-11					E	Calvert et al. (2011)		9.2955e-12
2-pentanol		5	CC(O)CCC	1S/C5H12O/c1-3-4-5(2)6/h5-6H,3-4H2,1-2H3	OH	1.1e-11					E	Calvert et al. (2011)		1.17491e-11
3-pentanol		5	CCC(O)CC	1S/C5H12O/c1-3-5(64-2/h5-6H,3-4H2,1-2H3	OH	1.3e-11					E	Calvert et al. (2011)		1.44195e-11
3-methyl-1-butanol		5	CC(C)CCO	1S/C5H12O/c1-5(23-4-6/h5-6H,3-4H2,1-2H3	OH	1.4e-11	1.5e-12	-664	263	322	E	Calvert et al. (2011)		9.04285e-12
2-methyl-2-butanol		5	CC(O)(C)CC	1S/C5H12O/c1-4-5(2,36/h6H,4H2,1-3H3	OH	3.4e-12	2e-12	-160	263	354	E	Calvert et al. (2011)		3.0938e-12
3-methyl-2-butanol		5	CC(O)C(C)C	1S/C5H12O/c1-4(25(36/h4-6H,1-3H3	OH	1.2e-11	2.5e-12	-464	254	373	E	Calvert et al. (2011)		1.21064e-11
2,2-dimethyl-1-propanol		5	CC(C)(C)CO	1S/C5H12O/c1-5(2,3)4-6/h6H,4H2,1-3H3	OH	5.5e-12	5e-12	-28	293	377	E	Calvert et al. (2011)		4.40384e-12
1-hexanol		6	CCCCCCO	1S/C6H14O/c1-2-3-4-5-6-7/h7H,2-6H2,1H3	OH	1.3e-11					E	Calvert et al. (2011)		1.0697e-11
2-hexanol		6	CC(O)CCCC	1S/C6H14O/c1-3-4-5-6(2)7/h6-7H,3-5H2,1-2H3	OH	1.2e-11					E	Calvert et al. (2011)		1.31506e-11
2-methyl-2-pentanol		6	CC(O)(C)CCC	1S/C6H14O/c1-4-5-6(2,3)7/h7H,4-5H2,1-3H3	OH	7.1e-12					E	Calvert et al. (2011)		4.85866e-12
4-methyl-2-pentanol		6	CC(O)CC(C)C	1S/C6H14O/c1-5(2)4-6(3)7/h5-7H,4H2,1-3H3	OH	1.7e-11					E	Calvert et al. (2011)		1.28979e-11
2,3-dimethyl-2-butanol		6	CC(O)(C)C(C)C	1S/C6H14O/c1-5(2)6(3,4)7/h5,7H,1-4H3	OH	9.3e-12	1.45e-12	-554	268	354	E	Calvert et al. (2011)		5.216e-12
1-heptanol		7	CCCCCCCO	1S/C7H16O/c1-2-3-4-5-6-7-8/h8H,2-7H2,1H3	OH	1.3e-11					E	Calvert et al. (2011)		1.20985e-11
2,4-dimethyl-2-pentanol		7	CC(O)(C)CC(C)C	1S/C7H16O/c1-6(2)5-7(3,4)8/h6,8H,5H2,1-4H3	OH	1.1e-11					E	Calvert et al. (2011)		6.00751e-12
1-octanol		8	CCCCCCCCO	1S/C8H18O/c1-2-3-4-5-6-7-8-9/h9H,2-8H2,1H3	OH	1.3e-11					E	Calvert et al. (2011)		1.35e-11
3,5-dimethyl-3-hexanol		8	CCC(O)(C)CC(C)C	1S/C8H18O/c1-5-8(4,9)6-7(2)3/h7,9H,5-6H2,1-4H3	OH	1.3e-11					E	Calvert et al. (2011)		7.90831e-12
cyclic alcohols
cyclopentanol		5	OC1CCCC1	1S/C5H10O/c6-5-3-1-2-4-5/h5-6H,1-4H2	OH	1.1e-11					E	Calvert et al. (2011)		1.26876e-11
cyclohexanol		6	OC1CCCCC1	1S/C6H12O/c7-6-4-2-1-3-5-6/h6-7H,1-5H2	OH	1.7e-11					E	Calvert et al. (2011)		1.87471e-11
dialcohols
ethan-1,2-diol	ethylene glycol	2	OCCO	1S/C2H6O2/c3-1-2-4/h3-4H,1-2H2	OH	1.45e-11					E	IUPAC (June 2009)		1.52294e-11
propan-1,2-diol	propylene glycol	3	CC(O)CO	1S/C3H8O2/c1-3(52-4/h3-5H,2H2,1H3	OH	2.1e-11					E	IUPAC (June 2009)		2.25885e-11
butan-1,2-diol		4	CCC(O)CO	1S/C4H10O2/c1-2-4(6)3-5/h4-6H,2-3H2,1H3	OH	2.43e-11					E	Calvert et al. (2011)		2.95583e-11
butan-1,3-diol		4	CC(O)CCO	1S/C4H10O2/c1-4(6)2-3-5/h4-6H,2-3H2,1H3	OH	2.99e-11					E	Calvert et al. (2011)		1.72157e-11
butan-1,4-diol		4	C(O)CCC(O)	1S/C4H10O2/c5-3-1-2-4-6/h5-6H,1-4H2	OH	3.67e-11					P	Mason et al. (2010)		1.33607e-11
butan-2,3-diol		4	CC(O)C(O)C	1S/C4H10O2/c1-3(5)4(2)6/h3-6H,1-2H3	OH	2.12e-11					E	Calvert et al. (2011)		2.99476e-11
2-methyl-2,4-pentandiol		6	CC(O)(C)CC(O)C	1S/C6H14O2/c1-5(7)4-6(2,3)8/h5,7-8H,4H2,1-3H3	OH	2.5e-11					E	Calvert et al. (2011)		1.41804e-11
		number of entries
		33

## Sheet: aldehydes and hydroxyaldehydes
Systematic name	Aternative name	Carbon number	SMILES	InChI	Reagent	k(298K)	A	E/R	Lower T	Upper T	Category	Source	Comment	Calculated k(298 K)
acyclic aldehydes
methanal	formaldehyde	1	C=O	1S/CH2O/c1-2/h1H2	OH	8.5e-12	5.4e-12	-135	200	300	E	IUPAC (October 2007)		8.5e-12
ethanal	acetaldehyde	2	CC=O	1S/C2H4O/c1-2-3/h2H,1H3	OH	1.5e-11	4.7e-12	-345	200	380	E	IUPAC (May 2009)		1.503e-11
propanal	propionaldehyde	3	CCC=O	1S/C3H6O/c1-2-3-4/h3H,2H2,1H3	OH	1.9e-11	4.9e-12	-405	240	380	E	IUPAC (October 2007)		2.2011e-11
butanal	n-butyraldehyde	4	CCCC=O	1S/C4H8O/c1-2-3-4-5/h4H,2-3H2,1H3	OH	2.4e-11	6e-12	-410	250	430	E	IUPAC (October 2007)		2.46283e-11
2-methylpropanal	i-butyraldehyde	4	CC(C)C=O	1S/C4H8O/c1-4(23-5/h3-4H,1-2H3	OH	2.6e-11	6.8e-12	-410	240	425	E	IUPAC (June 2009)		2.9374e-11
pentanal	valeraldehyde	5	CCCCC=O	1S/C5H10O/c1-2-3-4-5-6/h5H,2-4H2,1H3	OH	2.66e-11	8.6e-12	-336	243	410	E	Calvert et al. (2011)		2.65815e-11
2-methylbutanal		5	CCC(C)C=O	1S/C5H10O/c1-3-5(2)4-6/h4-5H,3H2,1-2H3	OH	3.33e-11					E	Calvert et al. (2011)		3.22436e-11
3-methylbutanal		5	CC(C)CC=O	1S/C5H10O/c1-5(2)3-4-6/h4-5H,3H2,1-2H3	OH	2.59e-11					E	Calvert et al. (2011)		2.72551e-11
2,2-dimethylpropanal	pivaldehyde	5	CC(C)(C)C=O	1S/C5H10O/c1-5(2,3)4-6/h4H,1-3H3	OH	2.8e-11	5.3e-12	-494	243	425	E	Calvert et al. (2011)		2.8326e-11
hexanal		6	CCCCCC=O	1S/C6H12O/c1-2-3-4-5-6-7/h6H,2-5H2,1H3	OH	2.85e-11	4.3e-12	-565	263	353	E	Calvert et al. (2011)		2.7983e-11
2-methylpentanal		6	CCCC(C)C=O	1S/C6H12O/c1-3-4-6(2)5-7/h5-6H,3-4H2,1-2H3	OH	3.3e-11					E	Calvert et al. (2011)		3.41969e-11
3-methylpentanal		6	CCC(C)CC=O	1S/C6H12O/c1-3-6(2)4-5-7/h5-6H,3-4H2,1-2H3	OH	2.91e-11					E	Calvert et al. (2011)		3.00664e-11
4-methylpentanal		6	CC(C)CCC=O	1S/C6H12O/c1-6(2)4-3-5-7/h5-6H,3-4H2,1-2H3	OH	2.63e-11					E	Calvert et al. (2011)		2.77304e-11
3,3-dimethylbutanal		6	CC(C)(C)CC=O	1S/C6H12O/c1-6(2,3)4-5-7/h5H,4H2,1-3H3	OH	2.14e-11					E	Calvert et al. (2011)		2.23647e-11
2-ethylbutanal		6	CCC(CC)C=O	1S/C6H12O/c1-3-6(4-2)5-7/h5-6H,3-4H2,1-2H3	OH	4.02e-11					E	Calvert et al. (2011)		3.52957e-11
heptanal		7	CCCCCCC=O	1S/C7H14O/c1-2-3-4-5-6-7-8/h7H,2-6H2,1H3	OH	2.96e-11					E	Calvert et al. (2011)		2.93845e-11
2,3-dimethylpentanal		7	CCC(C)C(C)C=O	1S/C7H14O/c1-4-6(2)7(3)5-8/h5-7H,4H2,1-3H3	OH	4.2e-11					E	Calvert et al. (2011)		3.76818e-11
nonanal		9	CCCCCCCCC=O	1S/C9H18O/c1-2-3-4-5-6-7-8-9-10/h9H,2-8H2,1H3	OH	3.2e-11					E	Calvert et al. (2011)		3.21875e-11
cyclic aldehydes
cyclopropanecarbaldehyde		4	O=CC1CC1	1S/C4H6O/c5-3-4-1-2-4/h3-4H,1-2H2	OH	2.1e-11					E	Calvert et al. (2011)		2.71759e-11
cyclobutanecarbaldehyde		5	O=CC1CCC1	1S/C5H8O/c6-4-5-2-1-3-5/h4-5H,1-3H2	OH	2.63e-11					E	Calvert et al. (2011)		3.15823e-11
cyclopentanecarbaldehyde		6	O=CC1CCCC1	1S/C6H10O/c7-5-6-3-1-2-4-6/h5-6H,1-4H2	OH	3.13e-11					E	Calvert et al. (2011)		3.56788e-11
cyclohexanecarbaldehyde		7	O=CC1CCCCC1	1S/C7H12O/c8-6-7-4-2-1-3-5-7/h6-7H,1-5H2	OH	3.7e-11					E	Calvert et al. (2011)		4.02805e-11
dialdehydes/ketoaldehydes
ethandial	glyoxal	2	O=CC=O	1S/C2H2O2/c3-1-2-4/h1-2H	OH	9.7e-12	3.1e-12	-340	200	300	E	IUPAC (May 2008)		9.7e-12
2-oxo-propanal	methylglyoxal	3	O=C(C)C=O	1S/C3H4O2/c1-3(5)2-4/h2H,1H3	OH	1.3e-11	1.9e-12	-575	220	410	E	IUPAC (May 2008)		1.303e-11
[2,2-dimethyl-3-(2-oxo-propyl)-cyclopropyl]-acetaldehyde	caronaldehyde	10	O=C(C)CC(C(C)1C)C1CC=O	1S/C10H16O2/c1-7(12)6-9-8(4-5-11)10(9,2)3/h5,8-9H,4,6H2,1-3H3	OH	5e-11					E	Calvert et al. (2011)		2.36897e-11
(3-acetyl-2,2-dimethyl-cyclobutyl)-acetaldehyde	pinonaldehyde	10	CC1(C)C(C(C)=O)CC1CC=O	1S/C10H16O2/c1-7(12)9-6-8(4-5-11)10(9,2)3/h5,8-9H,4,6H2,1-3H3	OH	3.9e-11	5.2e-12	-600	290	380	E	IUPAC (December 2007)		2.86651e-11
hydroxy-aldehydes/dihydroxy-aldehydes
hydroxy-ethanal	glycolaldehyde	2	OCC=O	1S/C2H4O2/c3-1-2-4/h1,4H,2H2	OH	1.02e-11	1.02e-11	0	240	370	E	see comment	Consensus 298 K value, based on studies tabulated by IUPAC (October 2007). E/R based on IUPAC (October 2007)	1.02084e-11
2-hydroxy-propanal		3	CC(O)C=O	1S/C3H6O2/c1-3(5)2-4/h2-3,5H,1H3	OH	1.7e-11					E	Calvert et al. (2011)		1.85979e-11
3-hydroxy-propanal		3	O=CCCO	1S/C3H6O2/c4-2-1-3-5/h2,5H,1,3H2	OH	1.99e-11					E	Calvert et al. (2011)		2.06289e-11
2-hydroxy-butanal		4	O=CC(O)CC	1S/C4H8O2/c1-2-4(6)3-5/h3-4,6H,2H2,1H3	OH	2.37e-11					E	Calvert et al. (2011)		2.25869e-11
3-hydroxy-butanal		4	O=CCC(C)O	1S/C4H8O2/c1-4(6)2-3-5/h3-4,6H,2H2,1H3	OH	2.95e-11					E	Calvert et al. (2011)		2.98049e-11
2-hydroxy-2-methylpropanal		4	CC(O)(C)C=O	1S/C4H8O2/c1-4(2,6)3-5/h3,6H,1-2H3	OH	1.4e-11					E	Calvert et al. (2011)		1.36278e-11
2,3-dihydroxy-2-methylpropanal		4	O=CC(C)(O)CO	1S/C4H8O3/c1-4(7,2-5)3-6/h2,6-7H,3H2,1H3	OH	3.3e-11					P	Bates et al. (2016)	based on IUPAC preferred value for k(OH + propene)	2.17617e-11
2,3-dihydroxybutanal		4	CC(O)C(O)C=O	1S/C4H8O3/c1-3(6)4(7)2-5/h2-4,6-7H,1H3	OH	4.1e-11					P	Bates et al. (2016)	based on IUPAC preferred value for k(OH + propene)	4.40659e-11
		number of entries
		34

## Sheet: ketones and hydroxyketones
Systematic name	Aternative name	Carbon number	SMILES	InChI	Reagent	k(298K)	A	E/R	Lower T	Upper T	Category	Source	Comment	Calculated k(298 K)
acyclic ketones
propan-2-one	acetone	3	CC(C)=O	1S/C3H6O/c1-3(2)4/h1-2H3)	OH	1.8e-13	see comment		195	440	E	IUPAC (December 2007)	k = 8.8E-12*exp(-1320/T) + 1.7E-14*exp(423/T)	2.6e-13
butan-2-one		4	CC(CC)=O	1S/C4H8O/c1-3-4(2)5/h3H2,1-2H3)	OH	1.1e-12	1.5e-12	90	210	300	E	IUPAC (June 2009)		1.341e-12
pentan-2-one		5	CC(CCC)=O	1S/C5H10O/c1-3-4-5(2)6/h3-4H2,1-2H3)	OH	4.1e-12	3.8e-13	-705	248	323	E	Calvert et al. (2011)		3.95825e-12
pentan-3-one		5	CCC(CC)=O	1S/C5H10O/c1-3-5(6)4-2/h3-4H2,1-2H3)	OH	2e-12					E	Calvert et al. (2011)		2.422e-12
3-methyl-butan-2-one		5	CC(C(C)C)=O	1S/C5H10O/c1-4(2)5(3)6/h4H,1-3H3)	OH	3e-12	1.45e-12	-219	253	372	E	Calvert et al. (2011)		2.504e-12
hexan-2-one		6	CC(CCCC)=O	1S/C6H12O/c1-3-4-5-6(2)7/h3-5H2,1-2H3	OH	7.5e-12	8.4e-13	-654	263	353	E	Calvert et al. (2011)		5.91151e-12
hexan-3-one		6	CCCC(CC)=O	1S/C6H12O/c1-3-5-6(7)4-2/h3-5H2,1-2H3)	OH	6.4e-12					E	Calvert et al. (2011)		5.03925e-12
3-methyl-pentan-2-one		6	CC(C(C)CC)=O	1S/C6H12O/c1-4-5(2)6(3)7/h5H,4H2,1-3H3	OH	6.2e-12					E	Calvert et al. (2011)		5.3736e-12
4-methyl-pentan-2-one		6	CC(CC(C)C)=O	1S/C6H12O/c1-5(2)4-6(3)7/h5H,4H2,1-3H3)	OH	1.28e-11	8e-13	-828	253	372	E	Calvert et al. (2011)		6.58515e-12
3,3-dimethyl-butan-2-one		6	CC(C(C)(C)C)=O	1S/C6H12O/c1-5(7)6(2,3)4/h1-4H3)	OH	1.21e-12					E	Calvert et al. (2011)		1.456e-12
heptan-2-one		7	CC(CCCCC)=O	1S/C7H14O/c1-3-4-5-6-7(2)8/h3-6H2,1-2H3	OH	9.4e-12	3.25e-12	-317	260	330	E	Calvert et al. (2011)	Pre-exponential factor (A) adjusted to give the preferred value of k(298K)	7.31301e-12
5-methyl-hexan-2-one		7	CC(CCC(C)C)=O	1S/C7H14O/c1-6(2)4-5-7(3)8/h6H,4-5H2,1-3H3	OH	1.2e-11	1.24e-12	-674	263	372	E	Calvert et al. (2011)		7.06036e-12
2,4-dimethyl-pentan-3-one		7	CC(C)C(C(C)C)=O	1S/C7H14O/c1-5(2)7(8)6(3)4/h5-6H,1-4H3	OH	4.9e-12					E	Calvert et al. (2011)		4.748e-12
octan-2-one		8	CC(CCCCCC)=O	1S/C8H16O/c1-3-4-5-6-7-8(2)9/h3-7H2,1-2H3	OH	1.1e-11					E	Calvert et al. (2011)		8.71452e-12
nonan-2-one		9	CC(CCCCCCC)=O	1S/C9H18O/c1-3-5-6-8-9(10)7-4-2/h3-8H2,1-2H3	OH	1.22e-11					E	Calvert et al. (2011)		1.0116e-11
2,6-dimethyl-heptan-4-one		9	O=C(CC(C)C)CC(C)C	1S/C9H18O/c1-7(2)5-9(10)6-8(3)4/h7-8H,5-6H2,1-4H3	OH	2.5e-11					E	Calvert et al. (2011)		1.29103e-11
decan-2-one		10	CC(CCCCCCCC)=O	1S/C10H20O/c1-3-4-5-6-7-8-9-10(2)11/h3-9H2,1-2H3	OH	1.32e-11					E	Calvert et al. (2011)		1.15175e-11
cyclic ketones
cyclobutanone		4	O=C1CCC1	1S/C4H6O/c5-4-2-1-3-4/h1-3H2	OH	8.7e-13					E	Calvert et al. (2011)		8.96962e-13
cyclopentanone		5	O=C1CCCC1	1S/C5H8O/c6-5-3-1-2-4-5/h1-4H2	OH	2.9e-12					E	Calvert et al. (2011)		2.92343e-12
cyclohexanone		6	O=C1CCCCC1	1S/C6H10O/c7-6-4-2-1-3-5-6/h1-5H2)	OH	6.4e-12					E	Calvert et al. (2011)		6.42771e-12
3,3-dimethyl-bicyclo[2.2.1]heptan-2-one	camphenilone	9	O=C1C(C2)CCC2C(C)1C	1S/C9H14O/c1-9(2)7-4-3-6(5-7)8(9)10/h6-7H,3-5H2,1-2H3	OH	4.8e-12					E	Atkinson and Arey (2003)		5.3482e-12
6,6-dimethyl-bicyclo[3.1.1]heptan-2-one	nopinone	9	O=C1C(C2)C(C)(C)C2CC1	1S/C9H14O/c1-9(2)6-3-4-8(10)7(9)5-6/h6-7H,3-5H2,1-2H3	OH	1.52e-11					E	Calvert et al. (2011)		3.90705e-12
5-isopropyl-bicyclo[3.1.0]hexan-2-one	sabinaketone	9	O=C2C1CC(C(C)C)1CC2	1S/C9H14O/c1-6(2)9-4-3-8(10)7(9)5-9/h6-7H,3-5H2,1-2H3	OH	6e-12					E	Calvert et al. (2011)		3.90339e-12
1,7,7-trimethyl-bicyclo[2.2.1]heptan-2-one	camphor	10	CC12C(CC(C(C)2C)CC1)=O	1S/C10H16O/c1-9(2)7-4-5-10(9,3)8(11)6-7/h7H,4-6H2,1-3H3	OH	4.1e-12					E	Calvert et al. (2011)		4.31474e-12
diketones
butan-2,3-dione	biacetyl	4	CC(C(C)=O)=O	1S/C4H6O2/c1-3(5)4(2)6/h1-2H3	OH	2.3e-13	5.25e-13	243	240	350	E	IUPAC (June 2009)		2.6e-13
hexan-2,3-dione		6	CC(C(CCC)=O)=O	1S/C6H10O2/c1-3-4-6(8)5(2)7/h3-4H2,1-2H3	OH	3.6e-12					P	Bouzidi et al. (2017)		3.95825e-12
hexan-2,5-dione		6	CC(CCC(C)=O)=O	1S/C6H10O2/c1-5(7)3-4-6(2)8/h3-4H2,1-2H3	OH	7.13e-12					E	Calvert et al. (2011)		5.4892e-12
hydroxy-ketones and dihydroxyketones
hydroxy-propanone	hydroxyacetone, acetol	3	CC(CO)=O	1S/C3H6O2/c1-3(5)2-4/h4H,2H2,1H3	OH	4.5e-12	1.6e-12	-305	230	370	E	IUPAC (December 2007)		3.0384e-12
1-hydroxy-butan-2-one		4	CCC(CO)=O	1S/C4H8O2/c1-2-4(6)3-5/h5H,2-3H2,1H3	OH	7.6e-12					E	Calvert et al. (2011)		4.1194e-12
3-hydroxy-butan-2-one		4	CC(C(O)C)=O	1S/C4H8O2/c1-3(5)4(2)6/h3,5H,1-2H3	OH	9.3e-12					E	Calvert et al. (2011)		6.02788e-12
4-hydroxy-butan-2-one		4	CC(CCO)=O	1S/C4H8O2/c1-4(6)2-3-5/h5H,2-3H2,1H3	OH	1.04e-11					E	Calvert et al. (2011)		1.17589e-11
5-hydroxy-pentan-2-one		5	CC(CCCO)=O	1S/C5H10O2/c1-5(7)3-2-4-6/h6H,2-4H2,1H3	OH	1.55e-11					E	Calvert et al. (2011)		1.21049e-11
4-hydroxy-3-methyl-butan-2-one		5	CC(C(C)CO)=O	1S/C5H10O2/c1-4(3-6)5(2)7/h4,6H,3H2,1-2H3	OH	1.46e-11					E	Calvert et al. (2011)		1.41476e-11
3-hydroxy-3-methyl-butan-2-one		5	CC(C(C)(O)C)=O	1S/C5H10O2/c1-4(6)5(2,3)7/h7H,1-3H3	OH	8.5e-13					E	Calvert et al. (2011)		1.05776e-12
5-hydroxy-hexan-2-one		6	CC(CCC(C)O)=O	1S/C6H12O2/c1-5(7)3-4-6(2)8/h5,7H,3-4H2,1-2H3	OH	2.2e-11					E	Calvert et al. (2011)		1.596e-11
4-hydroxy-hexan-3-one		6	CCC(C(O)CC)=O	1S/C6H12O2/c1-3-5(7)6(8)4-2/h5,7H,3-4H2,1-2H3	OH	1.36e-11					E	Calvert et al. (2011)		1.10979e-11
6-hydroxy-hexan-3-one		6	CCC(CCCO)=O	1S/C6H12O2/c1-2-6(8)4-3-5-7/h7H,2-5H2,1H3	OH	1.7e-11					E	Calvert et al. (2011)		1.31859e-11
4-hydroxy-4-methyl-pentan-2-one		6	CC(CC(C)(O)C)=O	1S/C6H12O2/c1-5(7)4-6(2,3)8/h8H,4H2,1-3H3	OH	3.8e-12					E	Calvert et al. (2011)		3.0483e-12
5-hydroxy-heptan-2-one		6	CC(CCC(CC)O)=O	1S/C7H14O2/c1-3-7(9)5-4-6(2)8/h7,9H,3-5H2,1-2H3	OH	1.9e-11					E	Calvert et al. (2011)		2.03953e-11
6-hydroxy-heptan-3-one		6	CCC(CCC(C)O)=O	1S/C7H14O2/c1-3-7(9)5-4-6(2)8/h6,8H,3-5H2,1-2H3	OH	1.6e-11					E	Calvert et al. (2011)		1.7041e-11
1-hydroxy-4-heptanone		7	CCCC(CCCO)=O	1S/C7H14O2/c1-2-4-7(9)5-3-6-8/h8H,2-6H2,1H3	OH	1e-11					E	Calvert et al. (2011)		1.58032e-11
5-hydroxy-octan-2-one		8	CC(CCC(O)CCC)=O	1S/C8H16O2/c1-3-4-8(10)6-5-7(2)9/h8,10H,3-6H2,1-2H3	OH	2.3e-11					E	Calvert et al. (2011)		2.21601e-11
6-hydroxy-octan-3-one		8	CCC(CCC(O)CC)=O	1S/C8H16O2/c1-3-7(9)5-6-8(10)4-2/h7,9H,3-6H2,1-2H3	OH	1.5e-11					E	Calvert et al. (2011)		2.14763e-11
7-hydroxy-octan-4-one		8	CCCC(CCC(O)C)=O	1S/C8H16O2/c1-3-4-8(10)6-5-7(2)9/h7,9H,3-6H2,1-2H3	OH	1.9e-11					E	Calvert et al. (2011)		1.96582e-11
3,4-dihydroxy-2-butanone		4	CC(C(O)CO)=O	1S/C4H8O3/c1-3(6)4(7)2-5/h4-5,7H,2H2,1H3	OH	1.2e-11					P	Bates et al. (2016)	Based on IUPAC preferred value for k(OH + propene)	2.32806e-11
		number of entries
		45

## Sheet: hydroperoxides
Systematic name	Aternative name	Carbon number	SMILES	InChI	Reagent	k(298K)	A	E/R	Lower T	Upper T	Category	Source	Comment	Calculated k(298 K)
methyl hydroperoxide		1	COO	1S/CH4O2/c1-3-2/h2H,1H3	OH	1e-11	5.3e-12	-190	220	430	E	IUPAC (December 2007)		3.568e-12
ethyl hydroperoxide		2	CCOO	1S/C2H6O2/c1-2-4-3/h3H,2H2,1H3	OH	> 6E-12					E	IUPAC (March 2009)		6.0439e-12
t-butyl hydroperoxide		4	OOC(C)(C)C	1S/C4H10O2/c1-4(2,3)6-5/h5H,1-3H3	OH	3.56e-12	7e-13	-485			P	Baasandorj et al. (2010)		3.6265e-12
		number of entries
		3

## Sheet: ethers and hydroxyethers
Systematic name	Aternative name	Carbon number	SMILES	InChI	Reagent	k(298K)	A	E/R	Lower T	Upper T	Category	Source	Comment	Calculated k(298 K)
acyclic monoethers
methoxy-methane	dimethyl ether	2	COC	1S/C2H6O/c1-3-2/h1-2H3)	OH	2.8e-12	5.7e-12	215	230	300	E	IUPAC (December 2007)		2.6e-12
methoxy-ethane	methyl ethyl ether	3	COCC	1S/C3H8O/c1-3-4-2/h3H2,1-2H3	OH	6.3e-12					E	Calvert et al. (2011)		7.355e-12
ethoxy-ethane	diethyl ether	4	CCOCC	1S/C4H10O/c1-3-5-4-2/h3-4H2,1-2H3)	OH	1.22e-11	4.62e-12	-289	230	300	E	Calvert et al. (2011)		1.211e-11
1-methoxy-butane	methyl n-butyl ether	5	COCCCC	1S/C5H12O/c1-3-4-5-6-2/h3-5H2,1-2H3	OH	1.45e-11	1.01e-11	-107	247	353	E	Calvert et al. (2011)		1.17472e-11
2-methoxy-2-methyl-propane	methyl t-butyl ether	5	COC(C)(C)C	1S/C5H12O/c1-5(2,3)6-4/h1-4H3)	OH	3e-12	4e-12	80	230	320	E	Calvert et al. (2011)		2.665e-12
1-propoxy-propane	di-n-propyl ether	6	CCCOCCC	1S/C6H14O/c1-3-5-7-6-4-2/h3-6H2,1-2H3	OH	2e-11	1.03e-11	-197	230	440	E	Calvert et al. (2011)		1.6934e-11
2-isopropoxy-propane	di-i-propyl ether	6	CC(OC(C)C)C	1S/C6H14O/c1-5(2)7-6(3)4/h5-6H,1-4H3)	OH	1e-11	2.97e-12	-361	230	400	E	Calvert et al. (2011)		1.302e-11
1-ethoxy-butane	ethyl n-butyl ether	6	CCOCCCC	1S/C6H14O/c1-3-5-6-7-4-2/h3-6H2,1-2H3	OH	2.2e-11	6.6e-12	-362	243	371	E	Calvert et al. (2011)		1.65022e-11
2-ethoxy-2-methyl-propane	ethyl t-butyl ether	6	CC(C)(C)OCC	1S/C6H14O/c1-5-7-6(2,3)4/h5H2,1-4H3)	OH	8.7e-12	3.4e-12	-280	230	400	E	Calvert et al. (2011)		7.42e-12
2-methoxy-2-methyl-butane	methyl t-amyl ether	6	COC(C)(C)CC	1S/C6H14O/c1-5-6(2,3)7-4/h5H2,1-4H3	OH	5.5e-12	3.07e-12	-172	230	400	E	Calvert et al. (2011)	k(298) from Arrhenius parameters	5.077e-12
1-isopropoxy-2-methyl-propane	i-propyl i-butyl ether	7	CC(C)COC(C)C	1S/C7H16O/c1-6(2)5-8-7(3)4/h6-7H,5H2,1-4H3	OH	2.1e-11					E	Calvert et al. (2011)		1.7676e-11
1-butoxy-butane	di-n-butyl ether	8	CCCCOCCCC	1S/C8H18O/c1-3-5-7-9-8-6-4-2/h3-8H2,1-2H3	OH	2.8e-11	4.5e-12	-550	248	343	E	Calvert et al. (2011)		2.08943e-11
2-tert-butoxy-2-methyl-propane	di-t-butyl ether	8	CC(OC(C)(C)C)(C)C	1S/C8H18O/c1-7(2,3)9-8(4,5)6/h1-6H3	OH	3.7e-12					E	Calvert et al. (2011)		2.73e-12
1-pentoxy-pentane	di-n-pentyl ether	10	CCCCCOCCCCC	1S/C10H22O/c1-3-5-7-9-11-10-8-6-4-2/h3-10H2,1-2H3	OH	3.3e-11	7.7e-12	-429	263	373	E	Calvert et al. (2011)		2.36974e-11
acyclic diethers
dimethoxy-methane		3	COCOC	1S/C3H8O2/c1-4-3-5-2/h3H2,1-2H3	OH	4.5e-12	2.7e-18	-879	230	300	E	Calvert et al. (2011)		8.2e-12
1,1-dimethoxy-ethane		4	CC(OC)OC	1S/C4H10O2/c1-4(5-2)6-3/h4H,1-3H3	OH	8.9e-12					E	Calvert et al. (2011)		8.655e-12
1,2-dimethoxy-ethane		4	COCCOC	1S/C4H10O2/c1-5-3-4-6-2/h3-4H2,1-2H3	OH	2.8e-11	5.3e-18	-1220	234	372	E	Calvert et al. (2011)		3.26e-11
diethoxy-methane		5	CCOCOCC	1S/C5H12O2/c1-3-6-5-7-4-2/h3-5H2,1-2H3	OH	1.96e-11	3.8e-18	-1212	252	400	E	Calvert et al. (2011)		1.771e-11
2,2-dimethoxy-propane		5	CC(OC)(OC)C	1S/C5H12O2/c1-5(2,6-3)7-4/h1-4H3	OH	4.1e-12	3.7e-12	-30	240	440	E	Calvert et al. (2011)	Pre-exponential factor (A) adjusted here to return k(298)	3.51e-12
1,2-diethoxy-ethane		6	CCOCCOCC	1S/C6H14O2/c1-3-7-5-6-8-4-2/h3-6H2,1-2H3	OH	5.8e-11	5.8e-18	-1400	298	372	E	Calvert et al. (2011)		4.211e-11
1,4-dimethoxy-butane		6	COCCCCOC	1S/C6H14O2/c1-7-5-3-4-6-8-2/h3-6H2,1-2H3	OH	3e-11					E	Calvert et al. (2011)		2.1067e-11
di-n-propoxy-methane		7	CCCOCOCCC	1S/C7H16O2/c1-3-5-8-7-9-6-4-2/h3-7H2,1-2H3	OH	2.7e-11	4.3e-12	-546	263	400	E	Calvert et al. (2011)		2.2534e-11
2,2-diethoxy-propane		7	CC(OCC)(OCC)C	1S/C7H16O2/c1-5-8-7(3,4)9-6-2/h5-6H2,1-4H3	OH	1.11e-11	1.06e-12	-15	240	440	E	Calvert et al. (2011)		1.302e-11
di-i-propoxy-methane		7	CC(OCOC(C)C)C	1S/C7H16O2/c1-6(2)8-5-9-7(3)4/h6-7H,5H2,1-4H3	OH	3.8e-11	4.4e-12	-646	250	400	E	Calvert et al. (2011)		1.862e-11
di-n-butoxy-methane		9	CCCCOCOCCCC	1S/C9H20O2/c1-3-5-7-10-9-11-8-6-4-2/h3-9H2,1-2H3	OH	3.6e-11	5.2e-12	-580	260	400	E	Calvert et al. (2011)		2.64943e-11
di-sec-butoxy-methane		9	CCC(OCOC(C)CC)C	1S/C9H20O2/c1-5-8(3)10-7-11-9(4)6-2/h8-9H,5-7H2,1-4H3	OH	4.3e-11	8.7e-12	-477	260	401	E	Calvert et al. (2011)		2.3444e-11
di-i-butoxy-methane		9	CC(C)COCOCC(C)C	1S/C9H20O2/c1-8(2)5-10-7-11-6-9(3)4/h8-9H,5-7H2,1-4H3	OH	3.6e-11					E	Calvert et al. (2011)		2.7932e-11
cyclic monoethers
oxirane	ethylene oxide	2	C1CO1	1S/C2H4O/c1-2-3-1/h1-2H2	OH	8.8e-14					E	Calvert et al. (2011)		8.848e-14
ethyl-oxirane		4	CCC1OC1	1S/C4H8O/c1-2-4-3-5-4/h4H,2-3H2,1H3	OH	1.9e-12					E	Calvert et al. (2011)		2.95548e-12
oxetane		4	O1CCC1	1S/C3H6O/c1-2-4-3-1/h1-3H2	OH	1.03e-11					E	Calvert et al. (2011)		1.03101e-11
tetrahydrofuran		5	O1CCCC1	1S/C4H8O/c1-2-4-5-3-1/h1-4H2	OH	1.7e-11	9.4e-12	-177	298	372	E	Calvert et al. (2011)		1.8467e-11
tetrahydropyran		6	C1CCCCO1	1S/C5H10O/c1-2-4-6-5-3-1/h1-5H2	OH	1.2e-11	7.8e-12	-136	263	372	E	Calvert et al. (2011)		1.19211e-11
2-methyl-tetrahydrofuran		6	CC1OCCC1	1S/C5H10O/c1-5-3-2-4-6-5/h5H,2-4H2,1H3	OH	2.27e-11	2.2e-12	-690	240	400	E	Calvert et al. (2011)		1.8922e-11
oxepane		7	O1CCCCCC1	1S/C6H12O/c1-2-4-6-7-5-3-1/h1-6H2	OH	1.8e-11	9.8e-12	-179	263	372	E	Calvert et al. (2011)		1.80795e-11
cyclic diethers
1,3-dioxolane		3	O1COCC1	1S/C3H6O2/c1-2-5-3-4-1/h1-3H2	OH	1e-11					E	Calvert et al. (2011)		9.912e-12
1,3-dioxane		4	O1COCCC1	1S/C4H8O2/c1-2-5-4-6-3-1/h1-4H2	OH	1e-11	8.6e-12	-45	240	440	E	Calvert et al. (2011)		1.10125e-11
1,4-dioxane		4	O1CCOCC1	1S/C4H8O2/c1-2-6-4-3-5-1/h1-4H2	OH	1.15e-11	6.8e-12	-159	240	440	E	Calvert et al. (2011)		9.408e-12
1,3-dioxepane		5	O1COCCCC1	1S/C5H10O2/c1-2-4-7-5-6-3-1/h1-5H2	OH	1.4e-11	6e-12	-250	263	372	E	Calvert et al. (2011)		1.39589e-11
4-methyl-1,3-dioxane		5	CC1OCOCC1	1S/C5H10O2/c1-5-2-3-6-4-7-5/h5H,2-4H2,1H3	OH	1.13e-11					E	Calvert et al. (2011)		1.14675e-11
cyclic triethers
1,3,5-trioxane		3	O1COCOC1	1S/C3H6O3/c1-4-2-6-3-5-1/h1-3H2	OH	5.5e-12	1.5e-11	302	263	372	E	Calvert et al. (2011)		5.544e-12
hydroxyethers
2-methoxyethanol		3	COCCO	1S/C3H8O2/c1-5-3-2-4/h4H,2-3H2,1H3	OH	1.3e-11	6e-18	-938	240	440	E	Calvert et al. (2011)		1.67294e-11
2-ethoxyethanol		4	CCOCCO	1S/C4H10O2/c1-2-6-4-3-5/h5H,2-4H2,1H3	OH	1.9e-11					E	Calvert et al. (2011)		2.14844e-11
1-methoxy-2-propanol		4	CC(O)COC	1S/C4H10O2/c1-4(53-6-2/h4-5H,3H2,1-2H3	OH	2e-11					E	Calvert et al. (2011)		2.6165e-11
3-methoxy-1-butanol		5	CC(OC)CCO	1S/C5H12O2/c1-5(7-2)3-4-6/h5-6H,3-4H2,1-2H3	OH	2.36e-11					E	Calvert et al. (2011)		1.84994e-11
3-ethoxy-1-propanol		5	OCCCOCC	1S/C5H12O2/c1-2-7-5-3-4-6/h6H,2-5H2,1H3	OH	2.2e-11					E	Calvert et al. (2011)		2.27994e-11
2-propoxy-ethanol		5	CCCOCCO	1S/C5H12O2/c1-2-4-7-5-3-6/h6H,2-5H2,1H3	OH	1.73e-11					E	Calvert et al. (2011)		2.38964e-11
2-isopropoxy-ethanol		5	CC(OCCO)C	1S/C5H12O2/c1-5(2)7-4-3-6/h5-6H,3-4H2,1-2H3	OH	2.26e-11					E	Calvert et al. (2011)		2.19394e-11
1-butoxy-2-propanol		7	CC(O)COCCCC	1S/C7H16O2/c1-3-4-5-9-6-7(28/h7-8H,3-6H2,1-2H3	OH	3.76e-11					E	Calvert et al. (2011)		3.53122e-11
cyclic hydroxyethers
cis-2-methyl-2,3-epoxy-1,4-butanediol		5	OC[C@@](O1)(C)[C@H]1CO	1S/C5H10O3/c1-5(3-7)4(2-6)8-5/h4,6-7H,2-3H2,1H3/t4-,5+/m1/s1	OH	1.67e-11					P	Bates et al. (2014)	Based on IUPAC preferred value for k(OH + propene)	2.0158e-11
trans-2-methyl-2,3-epoxy-1,4-butanediol		5	OC[C@@](O1)(C)[C@@H]1CO	1S/C5H10O3/c1-5(3-7)4(2-6)8-5/h4,6-7H,2-3H2,1H3/t4-,5-/m0/s1	OH	1.08e-11					P	Bates et al. (2014)	Based on IUPAC preferred value for k(OH + propene)	2.0158e-11
2-(oxiran-2-yl)-propane-1,2-diol		5	CC(O)(C1OC1)CO	1S/C5H10O3/c1-5(7,3-6)4-2-8-4/h4,6-7H,2-3H2,1H3	OH	9.2e-12					P	Bates et al. (2014)	Based on IUPAC preferred value for k(OH + propene)	8.19416e-12
		number of entries
		51

## Sheet: carboxylic acids
Systematic name	Aternative name	Carbon number	SMILES	InChI	Reagent	k(298K)	A	E/R	Lower T	Upper T	Category	Source	Comment	Calculated k(298 K)
acyclic acids
methanoic acid	formic acid	1	C(O)=O	1S/CH2O2/c2-1-3/h1H,(H,2,3)	OH	4.5e-13	4.5e-13	0	290	450	E	IUPAC (December 2007)		4.5e-13
ethanoic acid	acetic acid	2	CC(O)=O	1S/C2H4O2/c1-2(3)4/h1H3,(H,3,4)	OH	6.9e-13	4e-14	-850	220	300	E	IUPAC (May 2009)		6.02e-13
propanoic acid	propionic acid	3	CCC(O)=O	1S/C3H6O2/c1-2-3(4)5/h2H2,1H3,(H,4,5)	OH	1.2e-12	1.2e-12	0	290	450	E	IUPAC (December 2007)		1.2086e-12
butanoic acid	butyric acid	4	CCCC(O)=O	1S/C4H8O2/c1-2-3-4(5)6/h2-3H2,1H3,(H,5,6)	OH	1.8e-12					E	Calvert et al. (2011)		3.21706e-12
2-methylpropanoic acid	i-butyric acid	4	CC(C)C(O)=O	1S/C4H8O2/c1-3(2)4(5)6/h3H,1-2H3,(H,5,6)	OH	2.1e-12	2.1e-12	0	298	450	E	Calvert et al. (2011)		1.848e-12
acyclic keto-acids
2-oxo-propanoic acid	pyruvic acid	3	O=C(C)C(O)=O	1S/C3H4O3/c1-2(4)3(5)6/h1H3,(H,5,6)	OH	1.2e-13	4.9e-14	-276	273	371	E	Calvert et al. (2011)		1.2e-13
		number of entries
		6

## Sheet: esters
Systematic name	Aternative name	Carbon number	SMILES	InChI	Reagent	k(298K)	A	n	E/R	Lower T	Upper T	Category	Source	Comment	Calculated k(298 K)
formate esters
methanoic acid methyl ester	methyl formate	2	O=COC	1S/C2H4O2/c1-4-2-3/h2H,1H3	OH	1.79e-13	1.28e-18	2	-136	233	372	E	Calvert et al. (2011)		1.905e-13
methanoic acid ethyl ester	ethyl formate	3	O=COCC	1S/C3H6O2/c1-2-5-3-4/h3H,2H2,1H3	OH	8.74e-13	9e-19	2	-713	243	372	E	Calvert et al. (2011)		9.0915e-13
methanoic acid propyl ester	n-propyl formate	4	O=COCCC	1S/C4H8O2/c1-2-3-6-4-5/h4H,2-3H2,1H3	OH	1.85e-12	2.41e-18	2	-643	253	372	E	Calvert et al. (2011)		2.17608e-12
methanoic acid isopropyl ester	i-propyl formate	4	O=COC(C)C	1S/C4H8O2/c1-4(2)6-3-5/h3-4H,1-2H3	OH	2.29e-12						E	Calvert et al. (2011)		1.6975e-12
methanoic acid butyl ester	n-butyl formate	5	O=COCCCC	1S/C5H10O2/c1-2-3-4-7-5-6/h5H,2-4H2,1H3	OH	3.68e-12	4.95e-18	2	-633	253	371	E	Calvert et al. (2011)		3.57758e-12
methanoic acid tert-butyl ester	t-butyl formate	5	O=COC(C)(C)C	1S/C5H10O2/c1-5(2,3)7-4-6/h4H,1-3H3	OH	7.82e-13	5.41e-18	2	-145	253	372	E	Calvert et al. (2011)		6.065e-13
acetate esters
ethanoic acid methyl ester	methyl acetate	3	CC(OC)=O	1S/C3H6O2/c1-3(45-2/h1-2H3	OH	3.46e-13	6.69e-19	2	-525	240	440	E	Calvert et al. (2011)		3.38e-13
ethanoic acid ethyl ester	ethyl acetate	4	CC(OCC)=O	1S/C4H8O2/c1-3-6-4(25/h3H2,1-2H3	OH	1.8e-12	8.9e-19	2	-932	240	440	E	Calvert et al. (2011)		1.9193e-12
ethanoic acid propyl ester	n-propyl acetate	5	CC(OCCC)=O	1S/C5H10O2/c1-3-4-7-5(26/h3-4H2,1-2H3	OH	3.45e-12	1.46e-18	2	-978	240	440	E	Calvert et al. (2011)		3.54958e-12
ethanoic acid isopropyl ester	i-propyl acetate	5	CC(OC(C)C)=O	1S/C5H10O2/c1-4(27-5(36/h4H,1-3H3	OH	3.79e-12	4.55e-19	2	-1353	253	372	E	Calvert et al. (2011)		3.681e-12
ethanoic acid butyl ester	n-butyl acetate	6	CC(OCCCC)=O	1S/C6H12O2/c1-3-4-5-8-6(27/h3-5H2,1-2H3	OH	5.66e-12	3.03e-18	2	-908	263	372	E	Calvert et al. (2011)		4.95108e-12
ethanoic acid isobutyl ester	i-butyl acetate	6	CC(OCC(C)C)=O	1S/C6H12O2/c1-5(2)4-8-6(3)7/h5H,4H2,1-3H3	OH	6.47e-12	1.5e-18	2	-1157	263	372	E	Calvert et al. (2011)		4.69843e-12
ethanoic acid sec-butyl ester	sec-butyl acetate	6	CC(OC(C)CC)=O	1S/C6H12O2/c1-4-5(28-6(37/h5H,4H2,1-3H3	OH	6.1e-12	1.07e-18	2	-1240	263	372	E	Calvert et al. (2011)		5.86645e-12
ethanoic acid tert-butyl ester	t-butyl acetate	6	CC(OC(C)(C)C)=O	1S/C6H12O2/c1-5(78-6(2,34/h1-4H3	OH	5.75e-13	3.19e-18	2	-211	253	372	E	Calvert et al. (2011)		5.785e-13
ethanoic acid pentyl ester	n-pentyl acetate	7	CC(OCCCCC)=O	1S/C7H14O2/c1-3-4-5-6-9-7(2)8/h3-6H2,1-2H3	OH	7.39e-12	3.71e-18	2	-927	273	372	E	Calvert et al. (2011)		6.35259e-12
ethanoic acid 1,7,7-trimethyl-bicyclo[2.2.1]hept-2-yl ester	bornyl acetate	12	CC(OC1CC2CCC(C)1C(C)2C)=O	1S/C12H20O2/c1-8(13)14-10-7-9-5-6-12(10,4)11(9,2)3/h9-10H,5-7H2,1-4H3	OH	1.25e-11						E	Calvert et al. (2011)		8.90871e-12
propionate esters
propanoic acid methyl ester	methyl propionate	4	CCC(OC)=O	1S/C4H8O2/c1-3-4(5)6-2/h3H2,1-2H3	OH	8.73e-13	2e-18	2	-475	253	372	E	Calvert et al. (2011)		9.446e-13
propanoic acid ethyl ester	ethyl propionate	5	CCC(OCC)=O	1S/C5H10O2/c1-3-5(6)7-4-2/h3-4H2,1-2H3	OH	2.1e-12						E	Calvert et al. (2011)		2.5259e-12
propanoic acid propyl ester	n-propyl propionate	6	CCC(OCCC)=O	1S/C6H12O2/c1-3-5-8-6(7)4-2/h3-5H2,1-2H3	OH	4e-12						E	Calvert et al. (2011)		4.15618e-12
butyrate esters
butanoic acid methyl ester	methyl n-butyrate	5	CCCC(OC)=O	1S/C5H10O2/c1-3-4-5(6)7-2/h3-4H2,1-2H3	OH	3.36e-12	1.35e-18	2	-993	263	372	E	Calvert et al. (2011)		2.95306e-12
2-methylpropanoic acid methyl ester	methyl i-butyrate	5	CC(C)C(OC)=O	1S/C5H10O2/c1-4(2)5(6)7-3/h4H,1-3H3	OH	1.7e-12						E	Calvert et al. (2011)		1.584e-12
butanoic acid ethyl ester	ethyl n-butyrate	6	CCCC(OCC)=O	1S/C6H12O2/c1-3-5-6(7)8-4-2/h3-5H2,1-2H3	OH	4.5e-12						E	Calvert et al. (2011)		4.53436e-12
butanoic acid propyl ester	n-propyl n-butyrate	7	CCCC(OCCC)=O	1S/C7H14O2/c1-3-5-7(8)9-6-4-2/h3-6H2,1-2H3	OH	4.71e-12						E	Calvert et al. (2011)		6.16464e-12
2-methylpropanoic acid isopropyl ester	i-propyl i-butyrate	7	CC(C)C(OC(C)C)=O	1S/C7H14O2/c1-5(2)7(8)9-6(3)4/h5-6H,1-4H3	OH	7e-12						E	Calvert et al. (2011)		4.927e-12
butanoic acid butyl ester	n-butyl n-butyrate	8	CCCC(OCCCC)=O	1S/C8H16O2/c1-3-5-7-10-8(9)6-4-2/h3-7H2,1-2H3	OH	1.06e-11						E	Calvert et al. (2011)		7.56614e-12
pentanoate esters
pentanoic acid methyl ester	methyl n-pentanoate	6	CCCCC(OC)=O	1S/C6H12O2/c1-3-4-5-6(7)8-2/h3-5H2,1-2H3	OH	5.26e-12	1.88e-18	2	-1028	263	372	E	Calvert et al. (2011)		4.71792e-12
2,2-dimethylpropanoic acid methyl ester	methyl pivalate	6	CC(C)(C)C(OC)=O	1S/C6H12O2/c1-6(2,3)5(7)8-4/h1-4H3	OH	1.19e-12	see comment			250	370	E	Calvert et al. (2011)	k = 3.47E-11*exp(-1431/T) + 1.68E-13*exp(503/T)	1.339e-12
hexanoate esters
hexanoic acid methyl ester	methyl n-hexanoate	7	CCCCCC(OC)=O	1S/C7H14O2/c1-3-4-5-6-7(8)9-2/h3-6H2,1-2H3	OH	7.3e-12	3.3e-18	2	-958	263	372	E	Calvert et al. (2011)	k(298) calculated here	6.11942e-12
di-esters
methanoic acid 2-methanalyloxy-ethyl ester	ethylene glycol diformate	4	O=COCCOC=O	1S/C4H6O4/c5-3-7-1-2-8-4-6/h3-4H,1-2H2	OH	4.84e-13						E	Calvert et al. (2011)		1.92485e-12
ethanoic acid 2-ethanalyloxy-ethyl ester	ethylene glycol diacetate	6	CC(OCCOC(C)=O)=O	1S/C6H10O4/c1-5(7)9-3-4-10-6(2)8/h3-4H2,1-2H3	OH	2.16e-12						E	Calvert et al. (2011)		4.67186e-12
butandioic acid dimethyl ester	dimethyl succinate	6	O=C(OC)CCC(OC)=O	1S/C6H10O4/c1-9-5(7)3-4-6(8)10-2/h3-4H2,1-2H3	OH	1.36e-12						E	Calvert et al. (2011)		2.23304e-12
pentandioic acid dimethyl ester	dimethyl glutarate	7	O=C(OC)CCCC(OC)=O	1S/C7H12O4/c1-10-6(8)4-3-5-7(9)11-2/h3-5H2,1-2H3	OH	3.23e-12						E	Calvert et al. (2011)		7.00853e-12
hexandioic acid dimethyl ester	dimethyl adipate	8	O=C(OC)CCCCC(OC)=O	1S/C8H14O4/c1-11-7(9)5-3-4-6-8(10)12-2/h3-6H2,1-2H3	OH	8.15e-12						E	Calvert et al. (2011)		7.00853e-12
hydroxy esters
2-hydroxy-propanoic acid methyl ester	methyl lactate	4	OC(C)C(OC)=O	1S/C4H8O3/c1-3(5)4(6)7-2/h3,5H,1-2H3	OH	2.59e-12						E	Calvert et al. (2011)		2.9226e-12
2-hydroxy-propanoic acid ethyl ester	ethyl lactate	5	OC(C)C(OCC)=O	1S/C5H10O3/c1-3-8-5(7)4(2)6/h4,6H,3H2,1-2H3	OH	3.66e-12						E	Calvert et al. (2011)		4.5039e-12
carbonates
carbonic acid dimethyl ester	dimethyl carbonate	3	O=C(OC)OC	1S/C3H6O3/c1-5-3(4)6-2/h1-2H3	OH	3.26e-13	6.31e-19	2	-525	252	370	E	Calvert et al. (2011)		5.72e-13
lactones
5-methyl-dihydro-furan-2-one	g-valerolactone	5	CC1CCC(O1)=O	1S/C5H8O2/c1-4-2-3-5(6)7-4/h4H,2-3H2,1H3	OH	1.95e-12						P	Walavalkar et al. (2017)		2.62144e-12
3-methyl-dihydro-furan-2-one	a-methyl g-butyrolactone	5	CC(CCO1)C1=O	1S/C5H8O2/c1-4-2-3-7-5(4)6/h4H,2-3H2,1H3	OH	1.81e-12						P	Walavalkar et al. (2017)		2.23629e-12
		number of entries
		38

## Sheet: nitrogen-containing
Systematic name	Aternative name	Carbon number	SMILES	InChI	Reagent	k(298K)	A	E/R	Lower T	Upper T	Category	Source	Comment	Calculated k(298 K)
acyclic alkyl nitrates
nitrooxy-methane	methyl nitrate	1	CO[N+]([O-])=O	1S/CH3NO3/c1-5-2(3)4/h1H3	OH	2.3e-14	4e-13	845	220	300	E	IUPAC (July 2007)		2.08e-14
nitrooxy-ethane	ethyl nitrate	2	CCO[N+]([O-])=O	1S/C2H5NO3/c1-2-6-3(4)5/h2H2,1H3	OH	1.8e-13	6.7e-13	395	230	300	E	IUPAC (July 2007)		1.6724e-13
1-nitrooxy-propane	1-propyl nitrate	3	CCCO[N+]([O-])=O	1S/C3H7NO3/c1-2-3-7-4(5)6/h2-3H2,1H3	OH	5.8e-13					E	IUPAC (July 2007)		6.03064e-13
2-nitrooxy-propane	2-propyl nitrate	3	CC(C)O[N+]([O-])=O	1S/C3H7NO3/c1-3(2)7-4(5)6/h3H,1-2H3	OH	2.9e-13	6.2e-13	230	230	300	E	IUPAC (July 2007)		3.268e-13
1-nitrooxy-butane	1-butyl nitrate	4	CCCCO[N+]([O-])=O	1S/C4H9NO3/c1-2-3-4-8-5(6)7/h2-4H2,1H3	OH	1.6e-12					E	IUPAC (July 2007)		1.73273e-12
2-nitrooxy-butane	2-butyl nitrate	4	CCC(C)O[N+]([O-])=O	1S/C4H9NO3/c1-3-4(2)8-5(6)7/h4H,3H2,1-2H3	OH	8.6e-13					E	IUPAC (July 2007)		8.03e-13
2-methyl-1-nitrooxy-propane	2-methyl-1-propyl nitrate	4	CC(C)CO[N+]([O-])=O	1S/C4H9NO3/c1-4(2)3-8-5(6)7/h4H,3H2,1-2H3	OH	1.53e-12					E	Calvert et al. (2011)		1.0237e-12
1-nitrooxy-pentane	1-pentyl nitrate	5	CCCCCO[N+]([O-])=O	1S/C5H11NO3/c1-2-3-4-5-9-6(7)8/h2-5H2,1H3	OH	3.6e-12					E	Calvert et al. (2011)		3.13423e-12
2-nitrooxy-pentane	2-pentyl nitrate	5	CCCC(C)O[N+]([O-])=O	1S/C5H11NO3/c1-3-4-5(2)9-6(7)8/h5H,3-4H2,1-2H3	OH	1.72e-12					E	Calvert et al. (2011)		1.93266e-12
3-nitrooxy-pentane	3-pentyl nitrate	5	CCC(CC)O[N+]([O-])=O	1S/C5H11NO3/c1-3-5(4-2)9-6(7)8/h5H,3-4H2,1-2H3	OH	1.04e-12					E	Calvert et al. (2011)		1.3084e-12
2-methyl-1-nitrooxy-butane	2-methyl-1-butyl nitrate	5	CCC(C)CO[N+]([O-])=O	1S/C5H11NO3/c1-3-5(2)4-9-6(7)8/h5H,3-4H2,1-2H3	OH	2.33e-12					E	Calvert et al. (2011)		2.23916e-12
3-methyl-1-nitrooxy-butane	3-methyl-1-butyl nitrate	5	CC(C)CCO[N+]([O-])=O	1S/C5H11NO3/c1-5(2)3-4-9-6(7)8/h5H,3-4H2,1-2H3	OH	2.37e-12					E	Calvert et al. (2011)		2.88158e-12
3-methyl-2-nitrooxy-butane	3-methyl-2-butyl nitrate	5	CC(C)C(C)O[N+]([O-])=O	1S/C5H11NO3/c1-4(2)5(3)9-6(7)8/h4-5H,1-3H3	OH	1.7e-12					E	Calvert et al. (2011)		1.22364e-12
2,2-dimethyl-1-nitrooxy-propane	2,2-dimethyl-1-propyl nitrate	5	CC(C)(C)CO[N+]([O-])=O	1S/C5H11NO3/c1-5(2,3)4-9-6(7)8/h4H2,1-3H3	OH	7.9e-13					E	Calvert et al. (2011)		6.92604e-13
2-nitrooxy-hexane	2-hexyl nitrate	6	CCCCC(C)O[N+]([O-])=O	1S/C6H13NO3/c1-3-4-5-6(2)10-7(8)9/h6H,3-5H2,1-2H3	OH	2.94e-12					E	Calvert et al. (2011)		3.33416e-12
3-nitrooxy-hexane	3-hexyl nitrate	6	CCCC(CC)O[N+]([O-])=O	1S/C6H13NO3/c1-3-5-6(4-2)10-7(8)9/h6H,3-5H2,1-2H3	OH	2.5e-12					E	Calvert et al. (2011)		2.43806e-12
2-methyl-2-nitrooxy-pentane	2-methyl-2-pentyl nitrate	6	CC(C)(O[N+]([O-])=O)CCC	1S/C6H13NO3/c1-4-5-6(2,3)10-7(8)9/h4-5H2,1-3H3	OH	1.59e-12					E	Calvert et al. (2011)		1.65502e-12
3-methyl-2-nitrooxy-pentane	3-methyl-2-pentyl nitrate	6	CC(O[N+]([O-])=O)C(C)CC	1S/C6H13NO3/c1-4-5(2)6(3)10-7(8)9/h5-6H,4H2,1-3H3	OH	2.8e-12					E	Calvert et al. (2011)		2.4391e-12
3-nitrooxy-heptane	3-heptyl nitrate	7	CCCCC(CC)O[N+]([O-])=O	1S/C7H15NO3/c1-3-5-6-7(4-2)11-8(9)10/h7H,3-6H2,1-2H3	OH	3.42e-12					E	Calvert et al. (2011)		3.83957e-12
3-nitrooxy-octane	3-octyl nitrate	8	CCCCCC(CC)O[N+]([O-])=O	1S/C8H17NO3/c1-3-5-6-7-8(4-2)12-9(10)11/h8H,3-7H2,1-2H3	OH	3.6e-12					E	Calvert et al. (2011)		5.24107e-12
cyclic alkyl nitrates
nitrooxy-cyclohexane	cyclohexyl nitrate	6	O=[N+]([O-])OC1CCCCC1	1S/C6H11NO3/c8-7(9)10-6-4-2-1-3-5-6/h6H,1-5H2	OH	3.06e-12					E	Calvert et al. (2011)		5.07769e-12
acyclic alkyl dinitrates
1,2-dinitrooxypropane		3	CC(O[N+]([O-])=O)CO[N+]([O-])=O	1S/C3H6N2O6/c1-3(11-5(8)9)2-10-4(6)7/h3H,2H2,1H3	OH	<3E-13					E	Calvert et al. (2011)		1.6709e-13
1,2-dinitrooxybutane		4	CCC(O[N+]([O-])=O)CO[N+]([O-])=O	1S/C4H8N2O6/c1-2-4(12-6(9)10)3-11-5(7)8/h4H,2-3H2,1H3	OH	1.63e-12					E	Calvert et al. (2011)		5.88219e-13
2,3-dinitrooxybutane		4	CC(O[N+]([O-])=O)C(O[N+]([O-])=O)C	1S/C4H8N2O6/c1-3(11-5(7)8)4(2)12-6(9)10/h3-4H,1-2H3	OH	1.02e-12					E	Calvert et al. (2011)		2.50512e-13
1,4-dinitrooxybutane		4	O=[N+](OCCCCO[N+]([O-])=O)[O-]	1S/C4H8N2O6/c7-5(8)11-3-1-2-4-12-6(9)10/h1-4H2	OH	6.3e-12					P	Treves and Rudich (2003)		1.03815e-12
cyclic alkyl dinitrates
trans-1-methyl-1,2-dinitrooxycyclohexane		6	O=[N+](O[CH]1[C](O[N+]([O-])=O)(C)CCCC1)[O-]	1S/C7H12N2O6/c1-7(15-9(12)13)5-3-2-4-6(7)14-8(10)11/h6H,2-5H2,1H3	OH	1.66e-12					E	Calvert et al. (2011)		3.48165e-12
hydroxyalkyl nitrates
2-nitrooxy-1-propanol		3	CC(O[N+]([O-])=O)CO	1S/C3H7NO4/c1-3(2-5)8-4(6)7/h3,5H,2H2,1H3	OH	6.7e-12					P	Treves and Rudich (2003)	k = 3.47E-11*exp(-1431/T) + 1.68E-13*exp(503/T); k(298 K) also adopted by IUPAC (2016)	1.76914e-12
1-nitrooxy-2-propanol		3	CC(O)CO[N+]([O-])=O	1S/C3H7NO4/c1-3(5)2-8-4(6)7/h3,5H,2H2,1H3	OH	5.1e-12					P	Treves and Rudich (2003)	also adopted by IUPAC (2016)	2.64697e-12
2-nitrooxy-1-butanol		4	CCC(O[N+]([O-])=O)CO	1S/C4H9NO4/c1-2-4(3-6)9-5(7)8/h4,6H,2-3H2,1H3	OH	7.4e-12					P	Treves and Rudich (2003)		2.38718e-12
1-nitrooxy-2-butanol		4	CCC(O)CO[N+]([O-])=O	1S/C4H9NO4/c1-2-4(6)3-9-5(7)8/h4,6H,2-3H2,1H3	OH	7e-12					P	Treves and Rudich (2003)	k(298) calculated here	5.18608e-12
4-nitrooxy-2-butanol		4	CC(O)CCO[N+]([O-])=O	1S/C4H9NO4/c1-4(6)2-3-9-5(7)8/h4,6H,2-3H2,1H3	OH	1.04e-11					P	Treves and Rudich (2003)		8.60445e-12
3-nitrooxy-1-butanol		4	CC(O[N+]([O-])=O)CCO	1S/C4H9NO4/c1-4(2-3-6)9-5(7)8/h4,6H,2-3H2,1H3	OH	1.19e-11					P	Treves and Rudich (2003)		4.94932e-12
4-nitrooxy-1-butanol		4	OCCCCO[N+]([O-])=O	1S/C4H9NO4/c6-3-1-2-4-9-5(7)8/h6H,1-4H2	OH	1.26e-11					P	Treves and Rudich (2003)		7.19942e-12
1-nitrooxy-2-pentanol		5	CCCC(O)CO[N+]([O-])=O	1S/C5H11NO4/c1-2-3-5(7)4-10-6(8)9/h5,7H,2-4H2,1H3	OH	9.8e-12					P	Treves and Rudich (2003)		6.95094e-12
5-nitrooxy-2-pentanol		5	CC(O)CCCO[N+]([O-])=O	1S/C5H11NO4/c1-5(7)3-2-4-10-6(8)9/h5,7H,2-4H2,1H3	OH	3.21e-11					P	Treves and Rudich (2003)		1.10545e-11
4-nitrooxy-1-pentanol		5	CC(O[N+]([O-])=O)CCCO	1S/C5H11NO4/c1-5(3-2-4-7)10-6(8)9/h5,7H,2-4H2,1H3	OH	2.86e-11					P	Treves and Rudich (2003)		7.41483e-12
6-nitrooxy-1-hexanol		6	OCCCCCCO[N+]([O-])=O	1S/C6H13NO4/c8-5-3-1-2-4-6-11-7(9)10/h8H,1-6H2	OH	3.09e-11					P	Treves and Rudich (2003)		1.00024e-11
hydroxy-cycloalkyl nitrates
2-nitrooxy-cyclopentanol		5	OC1C(O[N+]([O-])=O)CCC1	1S/C5H9NO4/c7-4-2-1-3-5(4)10-6(8)9/h4-5,7H,1-3H2	OH	3.53e-12					E	Calvert et al. (2011)		5.58308e-12
acyclic carbonyl nitrates
a-nitrooxy propanone		3	CC(CO[N+]([O-])=O)=O	1S/C3H5NO4/c1-3(5)2-8-4(6)7/h2H2,1H3	OH	5.4e-13					E	Calvert et al. (2011)/Suarez-Bertoa (2012)		2.5304e-13
1-nitrooxy-2-butanone		4	CCC(CO[N+]([O-])=O)=O	1S/C4H7NO4/c1-2-4(6)3-9-5(7)8/h2-3H2,1H3	OH	8.4e-13					E	Calvert et al. (2011)		1.33404e-12
3-nitrooxy-2-butanone		4	CC(C(O[N+]([O-])=O)C)=O	1S/C4H7NO4/c1-3(6)4(2)9-5(7)8/h4H,1-2H3	OH	1.1e-12					E	Calvert et al. (2011)/Suarez-Bertoa (2012)		5.08173e-13
3-methyl-3-nitrooxy-2-butanone		5	CC(C(O[N+]([O-])=O)(C)C)=O	1S/C5H9NO4/c1-4(7)5(2,3)10-6(8)9/h1-3H3	OH	2.6e-13					E	Suarez-Bertoa et al. (2012)		4.09545e-13
cyclic carbonyl nitrates
2-nitrooxy-cyclohexanone		6	O=[N+](OC(CCCC1)C1=O)[O-]	1S/C6H9NO4/c8-5-3-1-2-4-6(5)11-7(9)10/h6H,1-4H2	OH	3.47e-12					E	Calvert et al. (2011)		4.51851e-12
peroxyacycl nitrates
peroxyacetyl nitrate		2	CC(OO[N+]([O-])=O)=O	1S/C2H3NO5/c1-2(4)7-8-3(5)6/h1H3	OH	<3E-14					E	IUPAC (August 2007)		1.3e-14
nitroalkanes
nitromethane		1	C[N+]([O-])=O	1S/CH3NO2/c1-2(3)4/h1H3	OH	1.09e-13					P	Nielsen et al. (1989)	Based on high pressure data. Lower values of k reported at low pressures (e.g. Liu et al., 1990)	1.1e-13
nitroethane		2	CC[N+]([O-])=O	1S/C2H5NO2/c1-2-3(4)5/h2H2,1H3	OH	1.44e-13					P	Nielsen et al. (1989)	Based on high pressure data. Lower values of k reported at low pressures (e.g. Liu et al., 1990)	1.503e-13
1-nitropropane		3	CCC[N+]([O-])=O	1S/C3H7NO2/c1-2-3-4(5)6/h2-3H2,1H3	OH	5.29e-13					P	Nielsen et al. (1989)	Based on high pressure data. Lower values of k reported at low pressures (e.g. Liu et al., 1990)	5.2389e-13
1-nitrobutane		4	CCCC[N+]([O-])=O	1S/C4H9NO2/c1-2-3-4-5(6)7/h2-4H2,1H3	OH	1.67e-12					P	Nielsen et al. (1989)	Based on high pressure data. Lower values of k reported at low pressures (e.g. Liu et al., 1990)	1.64548e-12
1-nitropentane		5	CCCCC[N+]([O-])=O	1S/C5H11NO2/c1-2-3-4-5-6(7)8/h2-5H2,1H3	OH	3.15e-12					P	Nielsen et al. (1989)	Based on high pressure data. Lower values of k reported at low pressures (e.g. Liu et al., 1990)	3.04698e-12
		number of entries
		49
