# Supplementary material for: Estimation of rate coefficients and branching ratios for gas-phase reactions of OH with aliphatic organic compounds for use in automated mechanism construction
Source: Copernicus journal article supplement (doi:10.5194/acp-2018-145), 2018-02-19
Supplement: Supplementary file 1 [file SI_1_OH_alkane_preferred data.xls]

## Sheet: Notes
Pressure independent rate coefficients for OH + organic compounds
Rate coefficients in the form: k = A.exp(-E/RT) (i)
Notes on data table columns
Systematic name	systematic name of organic compound, usually based on IUPAC nomenclature
Alternative name	alternative/common names for organic compound
Carbon number	the number of carbon atoms in the organic compound
SMILES:	SMILES notation for organic compound				http://www.daylight.com/smiles/index.html
InChI:	InChI notation for organic compound				http://iupac.org/who-we-are/divisions/division-details/inchi/
k(298K):	rate coefficient at 298 K in cm3 molecule-1 s-1
A:	cm3 molecule-1 s-1
E/R:	K
Lower T	Lower bound of valid temperature range (K)
Upper T	Upper bound of valid temperature range (K)
Category:	E = evaluation; P = published; G = grey literature
Source	Source reference
Comment:	Any further information influencing the preferred value
Calculated k(298K):	rate coefficient calculated by SAR at 298 K in cm3 molecule-1 s-1

## Sheet: References
References
Atkinson and Arey (2003)	Atkinson, R. and Arey, J.: Atmospheric degradation of volatile organic compounds, Chem. Rev., 103, 4605-4638, 2003.
Calvert et al. (2008)	Calvert, J. G., Derwent, R. G., Orlando, J. J., Tyndall, G. S. and Wallington, T. J.: Mechanisms of atmospheric oxidation of the alkanes, Oxford University Press, Oxford. ISBN 978-0-19536581-8, 2008.
IUPAC (Date)	Preferred value of the IUPAC Task Group on Atmospheric Chemical Kinetic Data Evaluation, http://iupac.pole-ether.fr/, in September 2017 ("Date" indicates date of evaluation of specific reaction)

## Sheet: acyclic alkanes
Systematic name	Aternative name	Carbon number	SMILES	InChI	Reagent	k(298K)	A	E/R	Lower T	Upper T	Category	Source	Comment	Calculated k(298K)
acyclic linear alkanes
methane		1	C	1S/CH4/h1H4	OH	6.4e-15	1.85e-12	1690	200	300	E	IUPAC (December 2007)
ethane		2	CC	1S/C2H6/c1-2/h1-2H3	OH	2.4e-13	6.9e-12	1000	200	300	E	IUPAC (December 2007)		2.6e-13
propane		3	CCC	1S/C3H8/c1-3-2/h3H2,1-2H3	OH	1.1e-12	7.6e-12	585	200	300	E	IUPAC (December 2007)		1.12e-12
butane	n-butane	4	CCCC	1S/C4H10/c1-3-4-2/h3-4H2,1-2H3	OH	2.35e-12	9.8e-12	425	230	300	E	IUPAC (December 2007)		2.4273e-12
pentane	n-pentane	5	CCCCC	1S/C5H12/c1-3-5-4-2/h3-5H2,1-2H3	OH	3.96e-12	1.81e-11	452	224	390	E	Calvert et al. (2008)		3.8288e-12
hexane	n-hexane	6	CCCCCC	1S/C6H14/c1-3-5-6-4-2/h3-6H2,1-2H3	OH	5.48e-12	2.05e-11	394	292	962	E	Calvert et al. (2008)	"A" scaled slightly here so that Arrhenius expression returns preferred k(298K)	5.23031e-12
heptane	n-heptane	7	CCCCCCC	1S/C7H16/c1-3-5-7-6-4-2/h3-7H2,1-2H3	OH	6.5e-12	2.76e-11	430	292	406	E	Calvert et al. (2008)		6.63181e-12
octane	n-octane	8	CCCCCCCC	1S/C8H18/c1-3-5-7-8-6-4-2/h3-8H2,1-2H3	OH	7.81e-12	3.43e-11	441	284	497	E	Calvert et al. (2008)		8.03331e-12
nonane	n-nonane	9	CCCCCCCCC	1S/C9H20/c1-3-5-7-9-8-6-4-2/h3-9H2,1-2H3	OH	9.75e-12					E	Calvert et al. (2008)		9.43481e-12
decane	n-decane	10	CCCCCCCCCC	1S/C10H22/c1-3-5-7-9-10-8-6-4-2/h3-10H2,1-2H3	OH	1.1e-11					E	Calvert et al. (2008)		1.08363e-11
undecane	n-undecane	11	CCCCCCCCCCC	1S/C11H24/c1-3-5-7-9-11-10-8-6-4-2/h3-11H2,1-2H3	OH	1.23e-11					E	Atkinson and Arey (2003)		1.22378e-11
dodecane	n-dodecane	12	CCCCCCCCCCCC	1S/C12H26/c1-3-5-7-9-11-12-10-8-6-4-2/h3-12H2,1-2H3	OH	1.32e-11					E	Atkinson and Arey (2003)		1.36393e-11
tridecane	n-tridecane	13	CCCCCCCCCCCCC	1S/C13H28/c1-3-5-7-9-11-13-12-10-8-6-4-2/h3-13H2,1-2H3	OH	1.51e-11					E	Atkinson and Arey (2003)		1.50408e-11
acyclic branched alkanes
2-methylpropane	i-butane	4	CC(C)C	1S/C4H10/c1-4(2)3/h4H,1-3H3	OH	2.1e-12	5.4e-12	285	230	300	E	IUPAC (December 2007)		2.0165e-12
2-methylbutane	i-pentane	5	CC(C)CC	1S/C5H12/c1-4-5(2)3/h5H,4H2,1-3H3	OH	3.75e-12	1.01e-11	296	222	407	E	Calvert et al. (2008)		3.57615e-12
2,2-dimethylpropane	neo-pentane	5	CC(C)(C)C	1S/C5H12/c1-5(2,3)4/h1-4H3	OH	8.2e-13	1.2e-11	800	287	901	E	Calvert et al. (2008)	3-parameter fit recommended for given T range by Calvert et al. (2008). Arrhenius parameters based on their suggested E/R of 800K below room T	7.02e-13
2-methylpentane		6	CC(C)CCC	1S/C6H14/c1-4-5-6(2)3/h6H,4-5H2,1-3H3	OH	5.26e-12	1.77e-11	362	283	398	E	Calvert et al. (2008)		4.97765e-12
3-methylpentane		6	CCC(C)CC	1S/C6H14/c1-4-6(3)5-2/h6H,4-5H2,1-3H3	OH	5.53e-12	1.8e-11	351	284	400	E	Calvert et al. (2008)		5.31833e-12
2,2-dimethylbutane		6	CC(C)(C)CC	1S/C6H14/c1-5-6(2,3)4/h5H2,1-4H3	OH	2.23e-12	3.37e-11	809	245	328	E	Calvert et al. (2008)		1.74015e-12
2,3-dimethylbutane		6	CC(C)C(C)C	1S/C6H14/c1-5(2)6(3)4/h5-6H,1-4H3	OH	6.14e-12	1.25e-11	212	292	407	E	Calvert et al. (2008)		4.725e-12
2,3-dimethylpentane		7	CC(C)C(C)CC	1S/C7H16/c1-5-7(4)6(2)3/h6-7H,5H2,1-4H3	OH	6.58e-12	1.53e-11	252	287	403	E	Calvert et al. (2008)		6.46718e-12
2,4-dimethylpentane		7	CC(C)CC(C)C	1S/C7H16/c1-6(2)5-7(3)4/h6-7H,5H2,1-4H3	OH	5.7e-12	2.7e-11	460	272	410	E	Calvert et al. (2008)		6.1265e-12
2,2,3-trimethylbutane		7	CC(C)(C)C(C)C	1S/C7H16/c1-6(2)7(3,4)5/h6H,1-5H3	OH	3.81e-12					E	Calvert et al. (2008)		2.889e-12
2,3,4-trimethylpentane		8	CC(C)C(C)C(C)C	1S/C8H18/c1-6(2)8(5)7(3)4/h6-8H,1-5H3	OH	6.6e-12					E	Calvert et al. (2008)		7.61603e-12
2,2,4-trimethylpentane		8	CC(C)(C)CC(C)C	1S/C8H18/c1-7(2)6-8(3,4)5/h7H,6H2,1-5H3	OH	3.34e-12					E	Calvert et al. (2008)		4.2905e-12
2,2,3,3-tetramethylbutane		8	CC(C)(C)C(C)(C)C	1S/C8H18/c1-7(2,3)8(4,5)6/h1-6H3	OH	9.72e-13	1.20417e-11	750	290	1180	E	Calvert et al. (2008)	3-parameter fit recommended for given T range by Calvert et al. (2008). Arrhenius parameters based on their suggested E/R of 750K below room T	1.053e-12
3,3-diethylpentane		9	CCC(CC)(CC)CC	1S/C9H20/c1-5-9(6-2,7-3)8-4/h5-8H2,1-4H3	OH	4.8e-12					E	Atkinson and Arey (2003)	Atkinson and Arey (2003)	4.8546e-12
		number of entries
		27

## Sheet: mono-cycloalkanes
Systematic name	Aternative name	Carbon number	SMILES	InChI	Reagent	k(298K)	A	E/R	Lower T	Upper T	Category	Source	Comment	Calculated k(298K)
cyclopropane		3	C1CC1	1S/C3H6/c1-2-3-1/h1-3H2	OH	7.4e-14	6e-12	1300	250	459	E	Calvert et al. (2008)		7.56811e-14
cyclobutane		4	C1CCC1	1S/C4H8/c1-2-4-3-1/h1-4H2	OH	2e-12	1.11e-11	510	272	469	E	Calvert et al. (2008)		2.29846e-12
cyclopentane		5	C1CCCC1	1S/C5H10/c1-2-4-5-3-1/h1-5H2	OH	4.9e-12	2.2e-11	450	209	407	E	Calvert et al. (2008)		4.83518e-12
cyclohexane		6	C1CCCCC1	1S/C6H12/c1-2-4-6-5-3-1/h1-6H2	OH	6.9e-12	3e-11	440	292	497	E	Calvert et al. (2008)		7.98856e-12
methyl-cyclopentane		6	CC1CCCC1	1S/C6H12/c1-6-4-2-3-5-6/h6H,2-5H2,1H3	OH	8.6e-12					E	Calvert et al. (2008)		5.91736e-12
isopropyl-cyclopropane		6	CC(C)C1CC1	1S/C6H12/c1-5(2)6-3-4-6/h5-6H,3-4H2,1-2H3	OH	2.61e-12					E	Calvert et al. (2008)		2.47894e-12
cycloheptane		7	C1CCCCCC1	1S/C7H14/c1-2-4-6-7-5-3-1/h1-7H2	OH	1.1e-11	4e-11	388	274	408	E	Calvert et al. (2008)		1.09878e-11
methyl-cyclohexane		7	CC1CCCCC1	1S/C7H14/c1-7-5-3-2-4-6-7/h7H,2-6H2,1H3	OH	9.64e-12					E	Calvert et al. (2008)		9.41239e-12
cyclooctane		8	C1CCCCCCC1	1S/C8H16/c1-2-4-6-8-7-5-3-1/h1-8H2	OH	1.3e-11	5.2e-11	408	300	390	E	Calvert et al. (2008)		1.30059e-11
butyl-cyclohexane		10	CCCCC1CCCCC1	1S/C10H20/c1-2-3-7-10-8-5-4-6-9-10/h10H,2-9H2,1H3	OH	1.47e-11					E	Atkinson and Arey (2003)		1.43398e-11
		number of entries
		10

## Sheet: poly-cycloalkanes
Systematic name	Aternative name	Carbon number	SMILES	InChI	Reagent	k(298K)	A	E/R	Lower T	Upper T	Category	Source	Comment	Calculated k(298K)
bicyclo[2.2.1]heptane	norbornane	7	C1(C2)CCC2CC1	1S/C7H12/c1-2-7-4-3-6(1)5-7/h6-7H,1-5H2	OH	5.1e-12					E	Calvert et al. (2008)		7.65818e-12
tetracyclo[2.2.1.02,6.03,5]heptane	quadricyclane	7	C2(C4)C3C1C4C1C23	1S/C7H8/c1-2-4-5(2)7-3(1)6(4)7/h2-7H,1H2	OH	1.7e-12					E	Calvert et al. (2008)		7.97884e-13
bicyclo[2.2.2]octane		8	C1(CC2)CCC2CC1	1S/C8H14/c1-2-8-5-3-7(1)4-6-8/h7-8H,1-6H2	OH	1.37e-11					E	Calvert et al. (2008)		1.38753e-11
bicyclo[3.3.0]octane		8	C12CCCC1CCC2	1S/C8H14/c1-3-7-5-2-6-8(7)4-1/h7-8H,1-6H2	OH	1.03e-11					E	Calvert et al. (2008)		9.29295e-12
cis-bicyclo[4.3.0]nonane		9	[H][C@]12CCCC[C@]([H])1CCC2	1S/C9H16/c1-2-5-9-7-3-6-8(9)4-1/h8-9H,1-7H2/t8-,9+	OH	1.6e-11					E	Calvert et al. (2008)		1.30329e-11
trans-bicyclo[4.3.0]-nonane		9	[H][C@]12CCCC[C@@]([H])1CCC2	1S/C9H16/c1-2-5-9-7-3-6-8(9)4-1/h8-9H,1-7H2/t8-,9-/m1/s1	OH	1.65e-11					E	Calvert et al. (2008)		1.30329e-11
cis-bicyclo[4.4.0]decane	cis-decalin	10	[H][C@]12CCCC[C@]([H])1CCCC2	1S/C10H18/c1-2-6-10-8-4-3-7-9(10)5-1/h9-10H,1-8H2/t9-,10+	OH	1.86e-11					E	Calvert et al. (2008)		1.72685e-11
trans-bicyclo[4.4.0]-decane	trans-decalin	10	[H][C@]12CCCC[C@@]([H])1CCCC2	1S/C10H18/c1-2-6-10-8-4-3-7-9(10)5-1/h9-10H,1-8H2/t9-,10-	OH	1.9e-11					E	Calvert et al. (2008)		1.72685e-11
tricyclo[5.2.1.02,6]decane		10	C2(C3)C1CCCC1C3CC2	1S/C10H16/c1-2-9-7-4-5-8(6-7)10(9)3-1/h7-10H,1-6H2	OH	1.06e-11					E	Calvert et al. (2008)		1.20381e-11
tricyclo[3.3.1.13,7]decane	adamantane	10	C13CC2CC(C3)CC(C2)C1	1S/C10H16/c1-7-2-9-4-8(1)5-10(3-7)6-9/h7-10H,1-6H2	OH	2.15e-11					E	Calvert et al. (2008)		2.01615e-11
(1R,2R,5R)-2,6,6-trimethylbicyclo[3.1.1]heptane	trans-pinane	10	CC1(C)[C@]2([H])CC[C@@H](C)[C@]([H])1C2	1S/C10H18/c1-7-4-5-8-6-9(7)10(8,2)3/h7-9H,4-6H2,1-3H3/t7-,8-,9-/m1/s1	OH	1.24e-11					E	Calvert et al. (2008)		8.76585e-12
1,7,7-trimethyl-tricyclo[2.2.1.02,6]heptane	tricyclene	10	CC13C2C1CC(C(C)3C)C2	1S/C10H16/c1-9(2)6-4-7-8(5-6)10(7,9)3/h6-8H,4-5H2,1-3H3	OH	2.7e-12					E	Calvert et al. (2008)		3.12814e-12
		number of entries
		12
